# Supplementary material for: Feeding on Beauveria bassiana-treated Frankliniella occidentalis causes negative effects on the predatory mite Neoseiulus barkeri
Source: PubMed Central journal article supplement (PMC4495565; doi:10.1038/srep12033), 2015-07-08
Supplement: srep12033-s1.pdf [file srep12033-s1.pdf]

## Supplementary Information

**Feeding on *Beauveria bassiana*-treated *Frankliniella occidentalis* causes negative effects on the predatory mite *Neoseiulus barkeri***

Shengyong Wu<sup>1</sup>, Yulin Gao<sup>1</sup>, Xuenong Xu<sup>1</sup>, Dengjie Wang<sup>1</sup>, Juan Li<sup>1</sup>, Haihong Wang<sup>1</sup>,  
Endong Wang<sup>1</sup> and Zhongren Lei<sup>1\*</sup>

<sup>1</sup>State Key Laboratory for Biology of Plant Diseases and Insect Pests, Institute of Plant Protection, Chinese Academy of Agricultural Sciences, Beijing 100193, P.R. China

\*Corresponding author Email: zrlei@ippcaas.cn (ZL)

**Supplementary Table S1** The body length and width of female *N. barkeri* feeding on *B. bassiana* -infected *F. occidentalis* larvae (treatment) and untreated larvae (control)

|            | Length ( $\mu\text{m}$ )<br>(mean $\pm$ SE) | Width ( $\mu\text{m}$ )<br>(mean $\pm$ SE) |
|------------|---------------------------------------------|--------------------------------------------|
| Treatment  | 361.5 $\pm$ 4.06b                           | 238.9 $\pm$ 5.26b                          |
| Control    | 403.2 $\pm$ 2.08a                           | 296.9 $\pm$ 2.37a                          |
| $F_{1,38}$ | 3.63                                        | 3.15                                       |
| $t$        | 9.13                                        | 10.06                                      |
| $P$        | <0.001                                      | <0.001                                     |

Values followed by the different lowercase letters within a column are significantly different using  $t$ -tests ( $P < 0.05$ ).

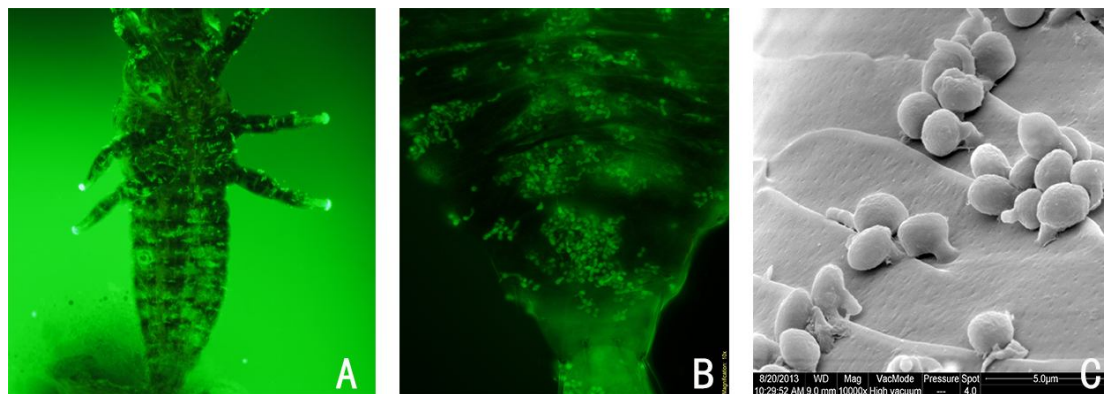

**Supplementary Fig. S1** Germination and infection of *B. bassiana* conidia on the cuticle of first instar larvae of *F. occidentalis* 12 h after treatment with *B. bassiana* using fluorescence and scanning electron microscopy. (A) conidia fluoresced green on the cuticle of *F. occidentalis* at 40 $\times$  magnification; (B) germinated conidia on the cuticle of *F. occidentalis* at 100 $\times$  magnification; (C) germ tube penetrating the cuticle
